# Supplementary figures and images for: Genetic Analysis and Evolutionary Changes of the Torque teno sus Virus
Source: MDPI journal article supplement (doi:10.3390/ijms20122881), 2019-06-13

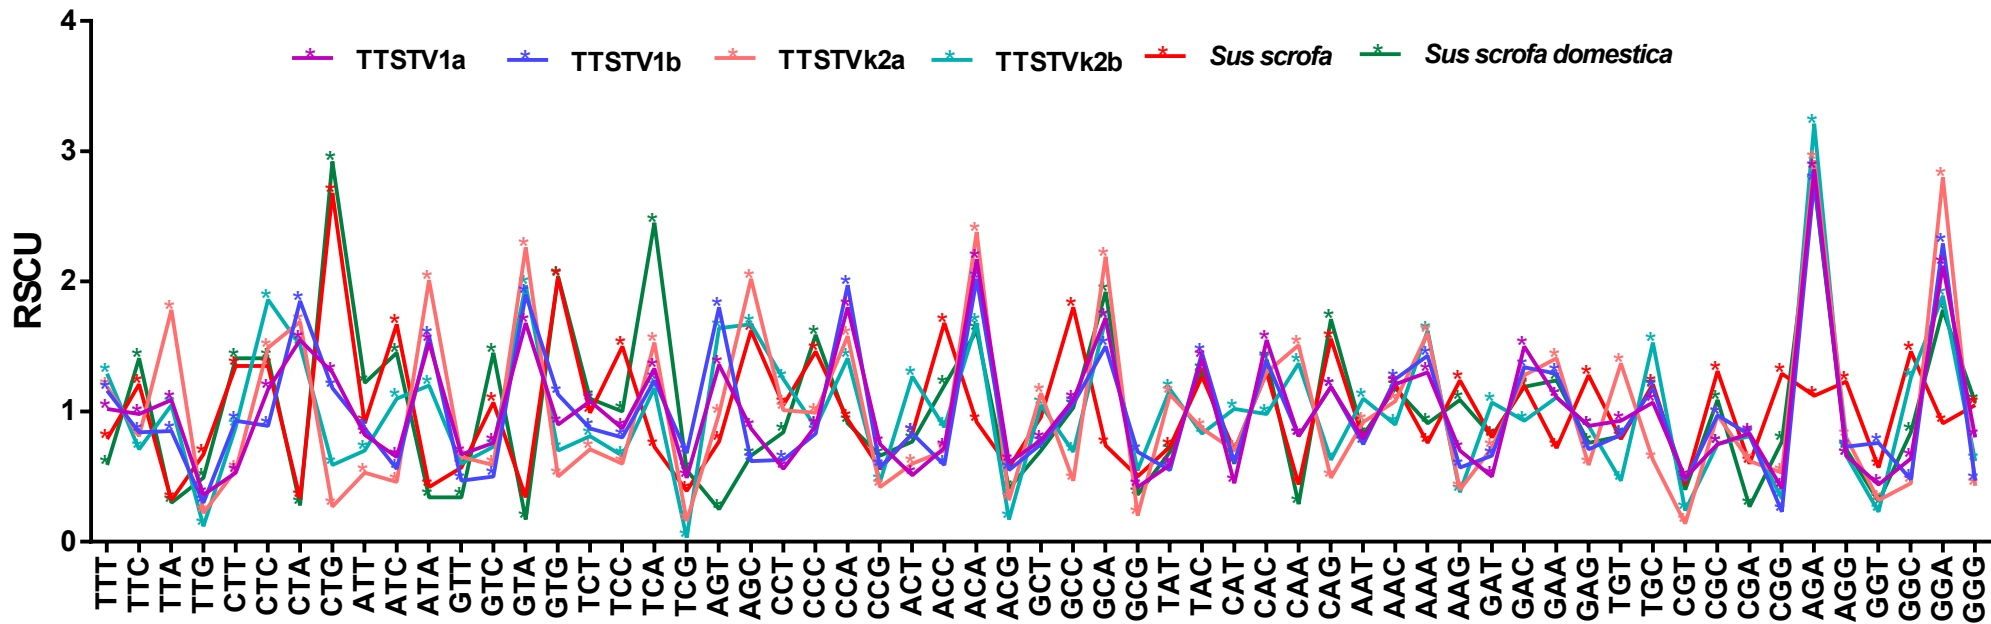

Supplement: s1 [file s1]
